# Supplementary material for: Impacts of Cigarette Smoking on the Tumor Immune Microenvironment in Esophageal Squamous Cell Carcinoma
Source: PubMed Central journal article supplement (PMC8771511; doi:10.7150/jca.65400), 2022-01-01
Supplement: jcav13p0413s1.pdf [file jcav13p0413s1.pdf]

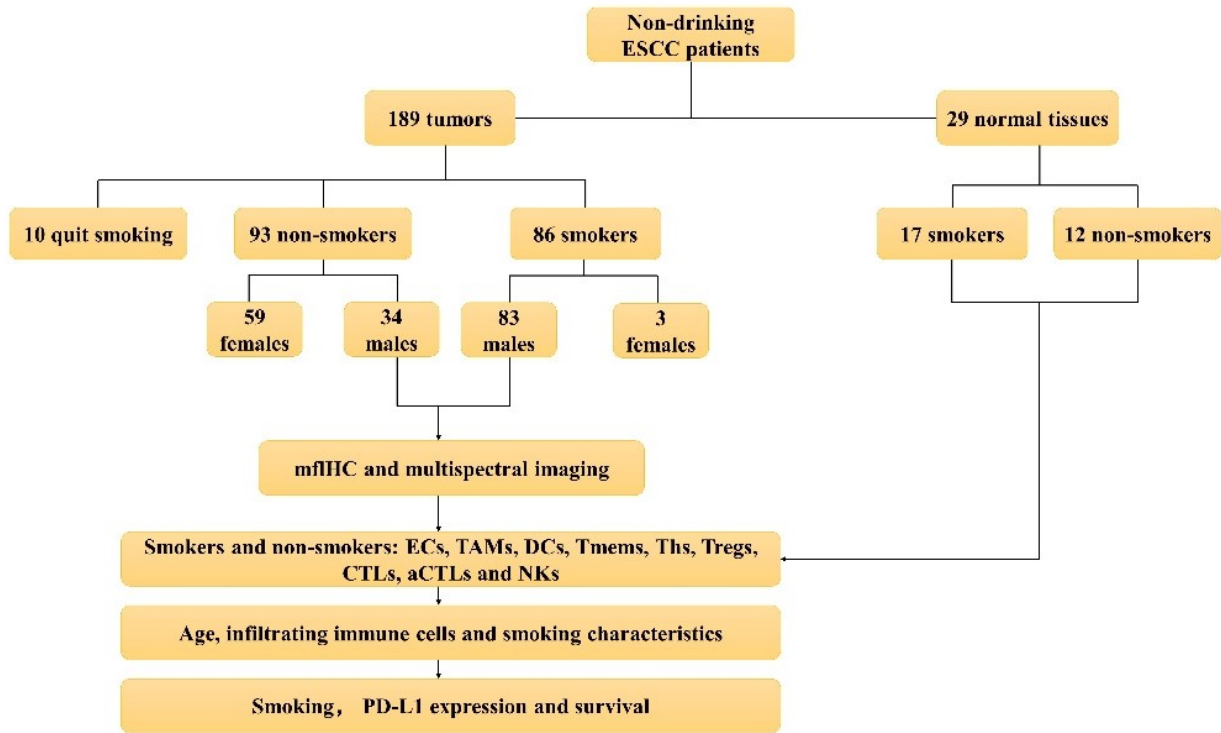

Figure S1. Overview flowchart of the study.

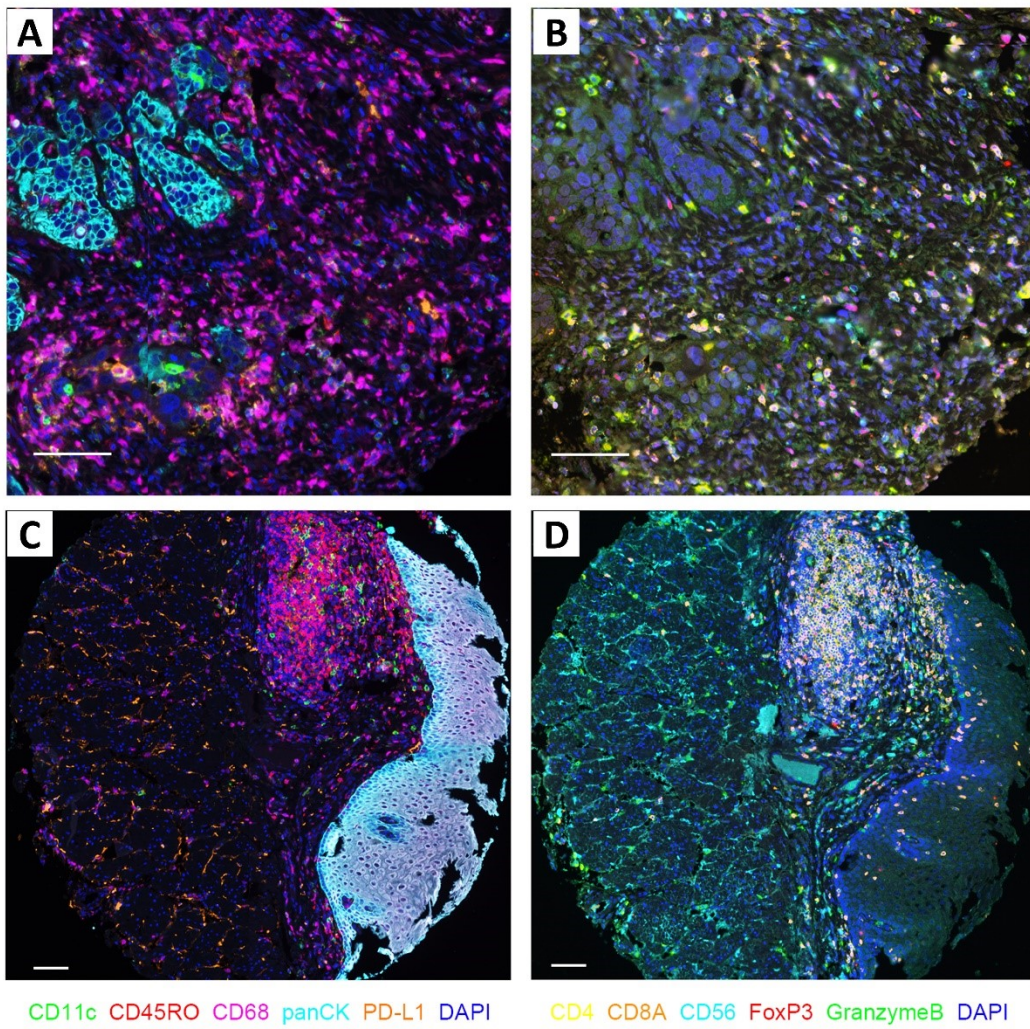

**Figure S2. The representative images displaying different immune subpopulation in ESCC tumor specimens after multispectral merged imaging for panel A (A and C) and panel B (B and D).**

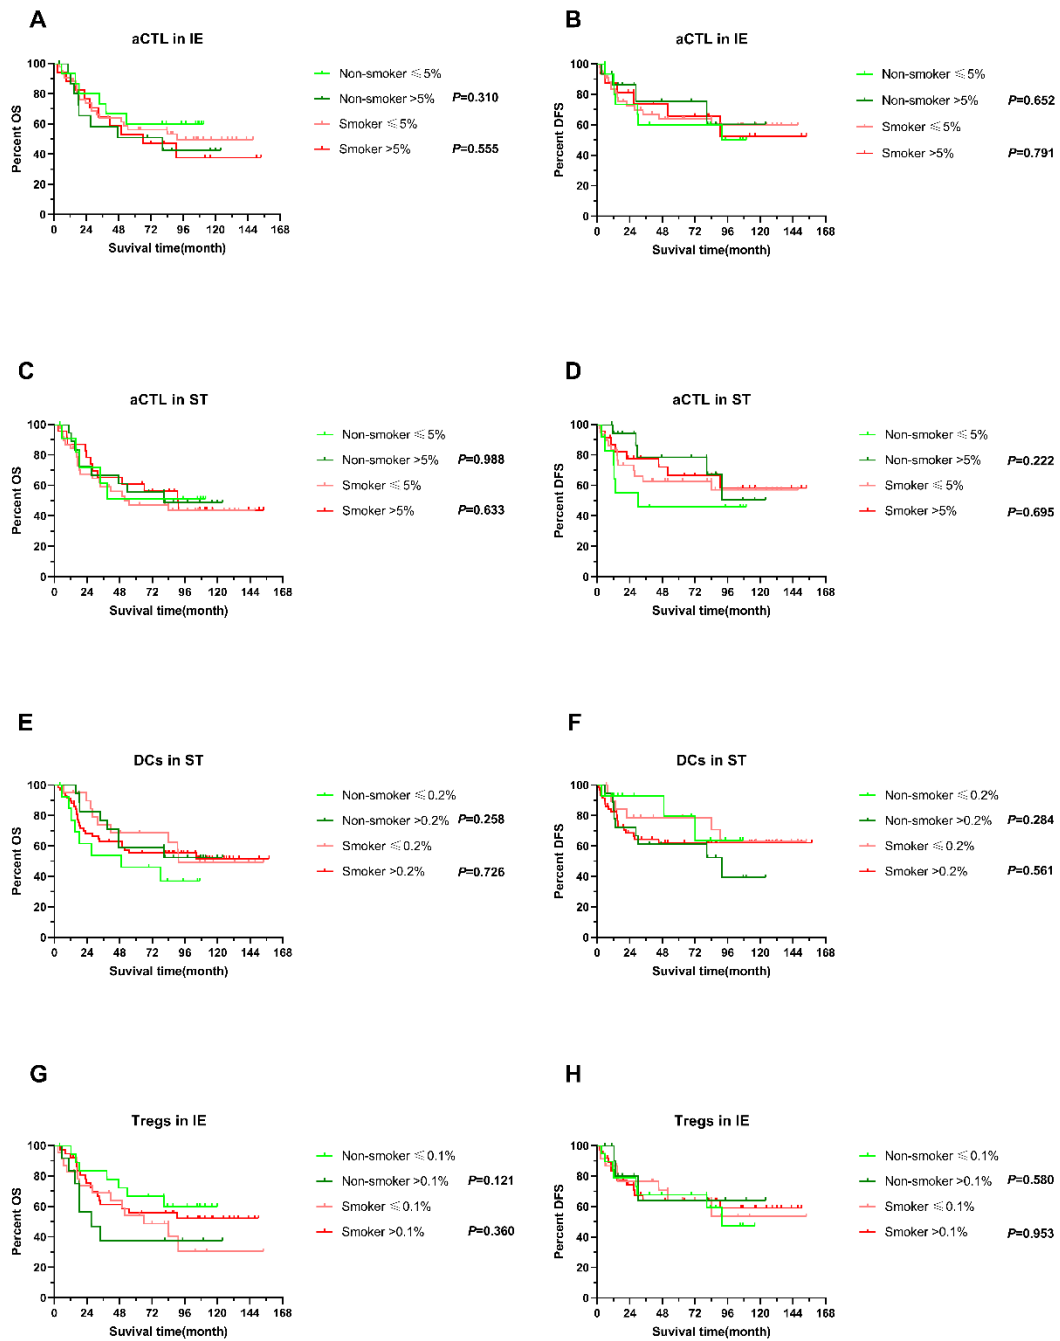

**Figure S3. OS of stratified immune cell infiltration in tumor specimens between smoking and non-smoking ESCC patients.**

**Table S1 Clinical characteristics of patients with normal specimens**

| Variables              | Total | Smoking status, n(%) |                          | P              |
|------------------------|-------|----------------------|--------------------------|----------------|
|                        |       | Non-smoker<br>(n=17) | Current smoker<br>(n=12) |                |
| <b>Gender</b>          |       |                      |                          | <b>0.001**</b> |
| <b>Male</b>            | 19    | 7 (36.8)             | 12 (63.2)                |                |
| <b>Female</b>          | 10    | 10 (100.0)           | 0 (0.0)                  |                |
| <b>Age</b>             |       |                      |                          | 0.999          |
| <b>≤ 58 yrs</b>        | 9     | 5 (55.6)             | 4 (44.4)                 |                |
| <b>&gt; 58yrs</b>      | 20    | 12 (60.0)            | 8 (40.0)                 |                |
| <b>Tumor size</b>      |       |                      |                          | 0.408          |
| <b>≤ 3.5cm</b>         | 21    | 11 (52.4)            | 10 (47.6)                |                |
| <b>&gt; 3.5cm</b>      | 8     | 6 (75.0)             | 2 (25.0)                 |                |
| <b>T stage</b>         |       |                      |                          | 0.273          |
| <b>T1-2</b>            | 11    | 8 (72.7)             | 3 (27.3)                 |                |
| <b>T3</b>              | 18    | 9 (50.0)             | 9 (50.0)                 |                |
| <b>N stage</b>         |       |                      |                          | 0.999          |
| <b>N0</b>              | 15    | 9 (60.0)             | 6 (40.0)                 |                |
| <b>N1-3</b>            | 14    | 8 (57.1)             | 6 (42.9)                 |                |
| <b>TNM stage</b>       |       |                      |                          | 0.471          |
| <b>I-II</b>            | 17    | 11 (64.7)            | 6 (35.3)                 |                |
| <b>III-IV</b>          | 12    | 6 (50.0)             | 6 (50.0)                 |                |
| <b>G stage</b>         |       |                      |                          | 0.488          |
| <b>W/D<sup>a</sup></b> | 3     | 1 (33.3)             | 2 (66.7)                 |                |
| <b>M/D</b>             | 15    | 8 (53.3)             | 7 (46.7)                 |                |
| <b>P/D</b>             | 11    | 8 (72.7)             | 3 (27.3)                 |                |

<sup>a</sup> W/D, well-differentiated; M/D, moderately differentiated; P/D, poorly differentiated.

\*\*  $P < 0.01$ .

**Table S2 Clinical characteristics of patient with cancer specimens**

| Variables         | Total | Smoking status, n(%) |                          | P     |
|-------------------|-------|----------------------|--------------------------|-------|
|                   |       | Non-smoker<br>(n=34) | Current smoker<br>(n=83) |       |
| <b>Age</b>        |       |                      |                          | 0.226 |
| ≤ 58 yrs†         | 61    | 15(24.6)             | 46(75.4)                 |       |
| > 58yrs           | 56    | 19(33.9)             | 37(66.1)                 |       |
| <b>Tumor size</b> |       |                      |                          | 0.489 |
| ≤ 3.5cm           | 54    | 14(25.9)             | 40(74.1)                 |       |
| > 3.5cm           | 63    | 20(31.7)             | 43(68.3)                 |       |
| <b>T stage</b>    |       |                      |                          | 0.092 |
| T1-2              | 29    | 12(41.4)             | 17(58.6)                 |       |
| T3                | 88    | 22(25.0)             | 66(75.0)                 |       |
| <b>N stage</b>    |       |                      |                          | 0.354 |
| N0                | 56    | 14(25.0)             | 42(75.0)                 |       |
| N1-3              | 61    | 20(32.8)             | 41(67.2)                 |       |
| <b>TNM stage</b>  |       |                      |                          | 0.869 |
| I-II              | 64    | 19(29.7)             | 45(70.3)                 |       |
| III-IV            | 53    | 15(28.3)             | 38(71.7)                 |       |
| <b>G stage</b>    |       |                      |                          | 0.087 |
| W/D ‡             | 30    | 8(26.7)              | 22(73.3)                 |       |
| M/D               | 61    | 14(23.0)             | 47(77.0)                 |       |
| P/D               | 26    | 12(46.2)             | 14(53.8)                 |       |

† Median age.

‡ W/D, well-differentiated; M/D, moderately differentiated; P/D, poorly differentiated.

**Table S3 Correlation between age and immune infiltration in patient of ESCC**

| Variables†  | Non-smokers |         |               | Smokers |       |                |
|-------------|-------------|---------|---------------|---------|-------|----------------|
|             | n           | $r_s^‡$ | <i>P</i>      | n       | $r_s$ | <i>P</i>       |
| IE TAM      | 32          | -0.01   | 0.970         | 79      | 0.33  | <b>0.003**</b> |
| ST TAM      | 32          | -0.10   | 0.600         | 78      | 0.36  | <b>0.001**</b> |
| IE DC       | 32          | -0.14   | 0.458         | 79      | 0.10  | 0.372          |
| ST DC       | 32          | -0.27   | 0.135         | 78      | 0.10  | 0.370          |
| IE Tmem     | 32          | 0.09    | 0.632         | 79      | -0.10 | 0.357          |
| ST Tmem     | 32          | 0.06    | 0.746         | 78      | -0.19 | 0.089          |
| IE Treg     | 31          | 0.39    | <b>0.032*</b> | 60      | -0.16 | 0.217          |
| ST Treg     | 30          | 0.07    | 0.711         | 61      | 0.00  | 0.988          |
| IE Th       | 31          | -0.29   | 0.115         | 60      | -0.03 | 0.828          |
| ST Th_s     | 30          | -0.06   | 0.738         | 61      | 0.07  | 0.617          |
| IE CTL      | 31          | 0.31    | 0.087         | 60      | 0.09  | 0.477          |
| ST CTL      | 30          | 0.21    | 0.269         | 61      | 0.00  | 0.990          |
| IE aCTL     | 31          | 0.28    | 0.129         | 60      | 0.09  | 0.515          |
| ST aCTL     | 30          | 0.06    | 0.736         | 61      | 0.01  | 0.987          |
| IE aCTL/CTL | 31          | -0.22   | 0.230         | 60      | 0.02  | 0.891          |
| ST aCTL/CTL | 30          | -0.30   | 0.111         | 61      | -0.03 | 0.818          |
| IE NK       | 31          | -0.37   | <b>0.043*</b> | 60      | 0.25  | 0.058          |
| ST NK       | 30          | -0.28   | 0.139         | 61      | 0.39  | <b>0.002**</b> |

† IE, intraepithelial. ST, stromal. ‡  $r_s$ , Spearman correlation coefficient.

\*  $P < 0.05$ , \*\*  $P < 0.01$

Table S4 Correlation between age, smoking characteristics, and infiltrated cell in tissues of smoking ESCC patients

| Infiltrating cell <sup>†</sup> | n  | Age                |                | Pack-years of smoking |               | Age-adjusted pack-years of smoking |          | Smoking year |                    | Age-adjusted smoking year |                |
|--------------------------------|----|--------------------|----------------|-----------------------|---------------|------------------------------------|----------|--------------|--------------------|---------------------------|----------------|
|                                |    | $r_s$ <sup>‡</sup> | <i>P</i>       | $r_s$                 | <i>P</i>      | $r_s$                              | <i>P</i> | $r_s$        | <i>P</i>           | $r_s$                     | <i>P</i>       |
| IE TAM                         | 79 | 0.33               | <b>0.003**</b> | 0.11                  | 0.347         | 0.04                               | 0.733    | 0.26         | <b>0.020*</b>      | 0.12                      | 0.312          |
| ST TAM                         | 78 | 0.36               | <b>0.001**</b> | 0.25                  | <b>0.029*</b> | 0.19                               | 0.105    | 0.47         | <b>&lt;0.001**</b> | 0.35                      | <b>0.002**</b> |
| IE DC                          | 79 | 0.10               | 0.372          | 0.08                  | 0.472         | 0.06                               | 0.590    | -0.02        | 0.855              | -0.09                     | 0.461          |
| ST DC                          | 78 | 0.10               | 0.37           | 0.15                  | 0.188         | 0.13                               | 0.252    | 0.09         | 0.433              | 0.04                      | 0.707          |
| IE Tmem                        | 79 | -0.11              | 0.357          | -0.13                 | 0.27          | -0.11                              | 0.355    | -0.18        | 0.104              | -0.15                     | 0.181          |
| ST Tmem                        | 78 | -0.19              | 0.089          | 0.07                  | 0.566         | 0.11                               | 0.328    | -0.06        | 0.595              | 0.05                      | 0.696          |
| IE Treg                        | 60 | -0.16              | 0.217          | -0.25                 | 0.056         | -0.21                              | 0.118    | -0.23        | 0.081              | -0.16                     | 0.214          |
| ST Treg                        | 61 | 0.00               | 0.988          | -0.12                 | 0.358         | -0.13                              | 0.338    | -0.06        | 0.629              | -0.08                     | 0.563          |
| IE Th                          | 60 | -0.03              | 0.828          | -0.01                 | 0.972         | 0.01                               | 0.963    | 0.03         | 0.802              | 0.06                      | 0.633          |
| ST Th                          | 61 | 0.07               | 0.617          | 0.05                  | 0.704         | 0.03                               | 0.808    | 0.13         | 0.303              | 0.12                      | 0.371          |
| IE CTL                         | 60 | 0.09               | 0.477          | 0.15                  | 0.26          | 0.12                               | 0.354    | 0.10         | 0.444              | 0.06                      | 0.676          |
| ST CTL                         | 61 | 0.00               | 0.99           | 0.08                  | 0.56          | 0.08                               | 0.543    | 0.08         | 0.561              | 0.09                      | 0.489          |
| IE aCTL                        | 60 | 0.09               | 0.515          | 0.15                  | 0.263         | 0.13                               | 0.347    | 0.16         | 0.234              | 0.13                      | 0.321          |
| ST aCTL                        | 61 | 0.00               | 0.987          | 0.01                  | 0.953         | 0.01                               | 0.948    | 0.01         | 0.971              | 0.01                      | 0.958          |
| IE aCTL/CTL                    | 60 | 0.02               | 0.891          | 0.06                  | 0.627         | 0.06                               | 0.642    | 0.14         | 0.294              | 0.16                      | 0.227          |
| ST aCTL/CTL                    | 61 | -0.03              | 0.818          | -0.06                 | 0.648         | -0.05                              | 0.687    | -0.05        | 0.728              | -0.04                     | 0.792          |
| IE NK                          | 60 | 0.25               | 0.058          | -0.04                 | 0.737         | -0.15                              | 0.266    | 0.14         | 0.278              | -0.01                     | 0.943          |
| ST NK                          | 61 | 0.39               | <b>0.002**</b> | 0.00                  | 0.994         | -0.13                              | 0.317    | 0.18         | 0.168              | -0.04                     | 0.759          |

<sup>†</sup> IE, intraepithelial. ST, stromal.  $r_s$ , Spearman correlation coefficient

\*  $P < 0.05$ , \*\*  $P < 0.01$
